# Supplementary material
Source: publisher figshare collection journal article supplement (https://springernature.figshare.com/articles/dataset/_/7698689)
Supplement: Supplementary file [file 14328236]

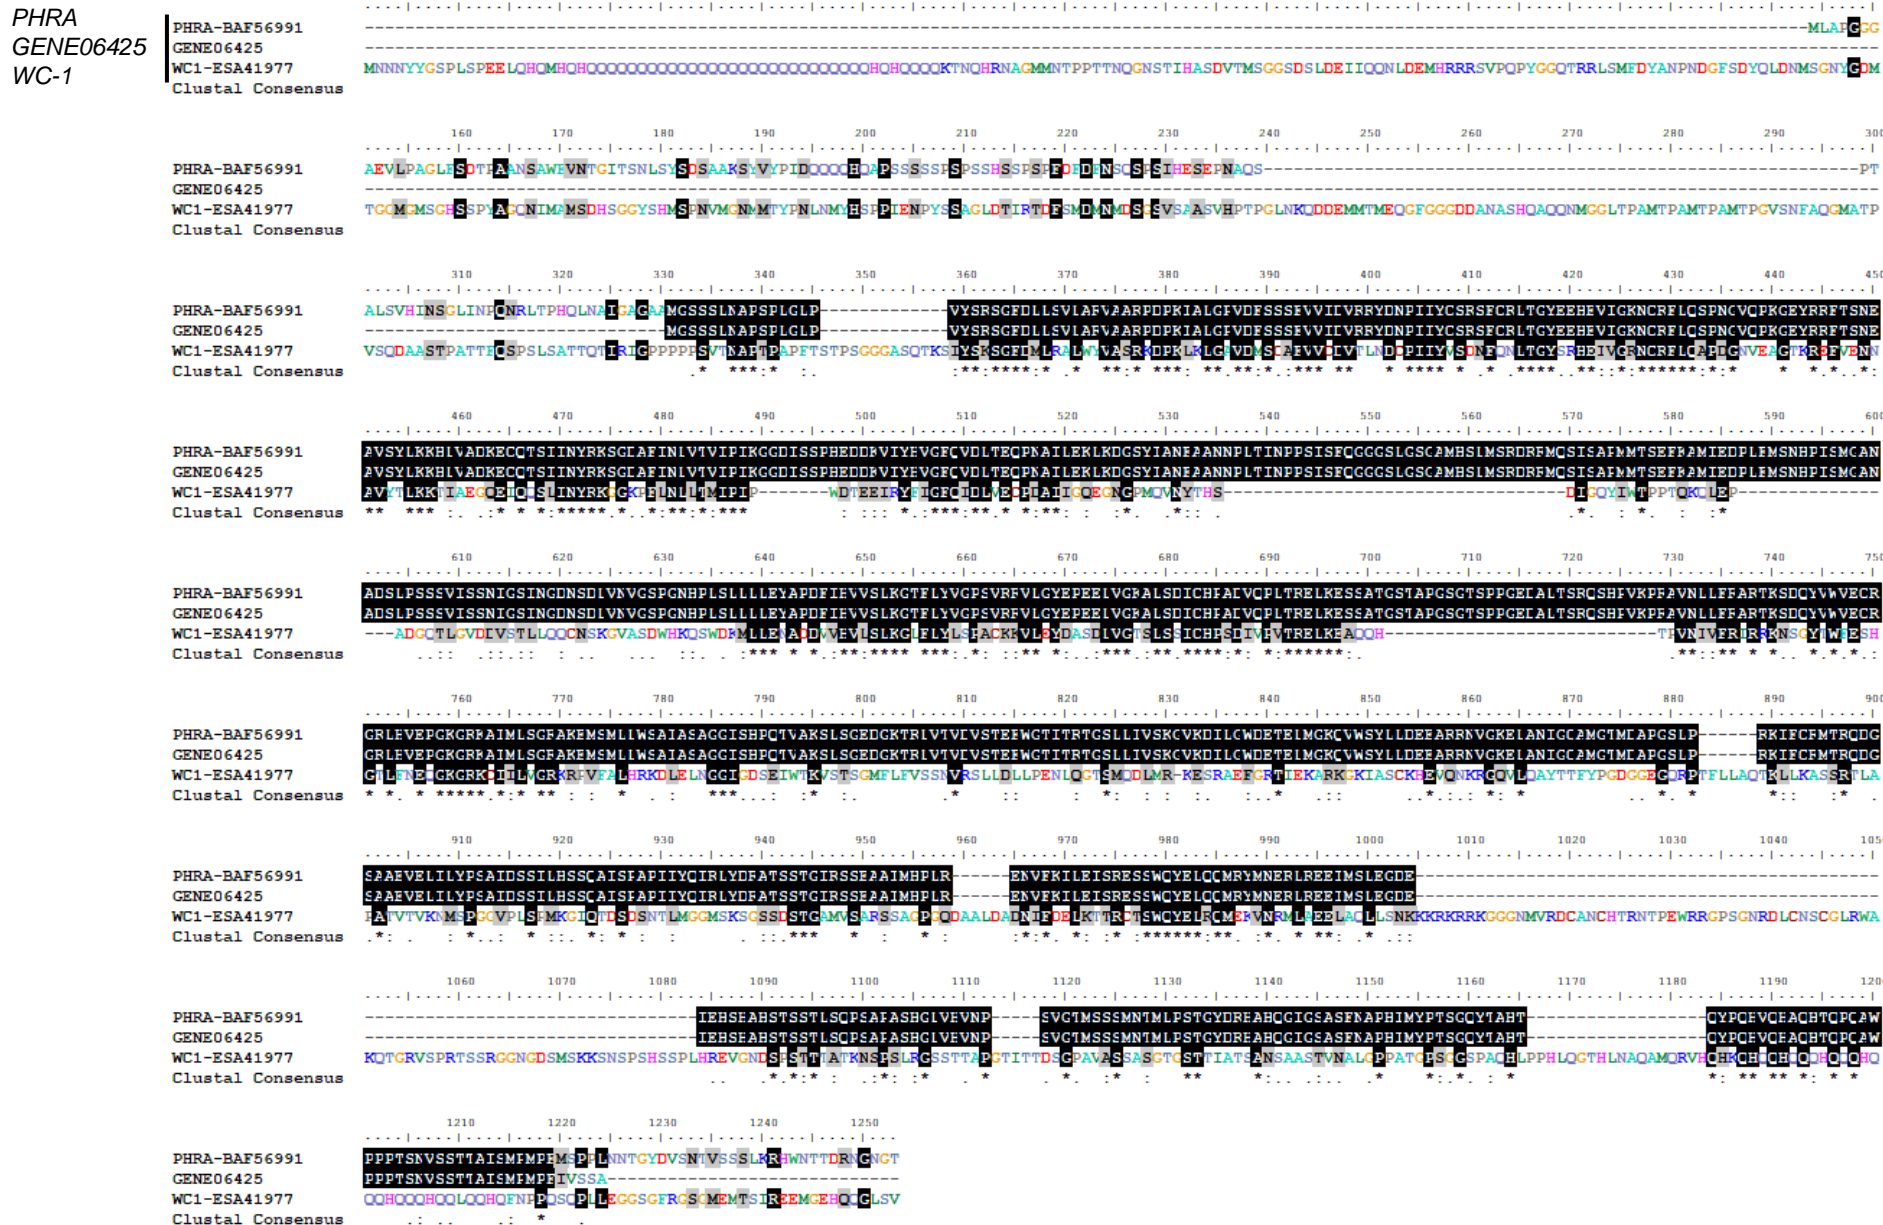

**Supplementary Fig. S2.** Multiple sequence alignment among WC-1 (GenBank no. ESA41977), PHRA (GenBank no. BAF56991), and GENE06425. Multiple sequence alignment was performed by CLUSTALW.
